# Supplementary material
Source: PubMed Central journal article supplement (PMC3151076)
Supplement: supp_M111.241422_jbc.M111.241422-1.pdf [file supp_M111.241422_jbc.M111.241422-1.pdf]

**MONOAMINE OXIDASE A EXPRESSION IS VITAL FOR EMBRYONIC BRAIN DEVELOPMENT  
BY MODULATING DEVELOPMENTAL APOPTOSIS**

Chi Chiu Wang<sup>2,3,4</sup>, Astrid Borchert<sup>1</sup>, Aslihan Ugun-Klusek<sup>5</sup>, Ling Yin Tang<sup>2</sup>, Wai Ting Lui<sup>2</sup>, Ching Yan Chu<sup>2</sup>, Ellen Billett<sup>5</sup>, Hartmut Kuhn<sup>1</sup>, Christoph Ufer<sup>1,5</sup>

<sup>1</sup>Institute of Biochemistry, University Medicine Berlin - Charité, Oudenarder Str. 16, D-13347 Berlin, Germany; <sup>2</sup>Department of Obstetrics and Gynaecology, <sup>3</sup>Li Ka Shing Institute of Health Sciences, and <sup>4</sup>Neuro-degeneration and -development and Repair, Institute of Biomedical Sciences. The Chinese University of Hong Kong, Shatin, Hong Kong; <sup>5</sup>School of Science and Technology, Nottingham Trent University, Clifton Lane, Nottingham, NG11 8NS, United Kingdom.

Running head: MAO-A knockdown and embryogenesis

Address correspondence to: Dr. Hartmut Kuhn, Institute for Biochemistry, University Medicine Berlin - Charité, Oudenarder Str. 16, D-13347 Berlin, Germany; Tel. 49-30-450 528040, Fax 49-30-450 528905, e-mail: [hartmut.kuehn@charite.de](mailto:hartmut.kuehn@charite.de)

## 1. Methodological details

### Oligonucleotides

**Table S1.** Sequence of amplification primers used for quantification of different gene products, for preparation of the in situ hybridization probes and of the siRNA constructs.

| Gene product                                                   | Direction  | Sequence                                        |
|----------------------------------------------------------------|------------|-------------------------------------------------|
| mRNA quantification primers                                    |            |                                                 |
| MAO-A                                                          | Forward    | 5'- TTC AGCGTC TTC CAA TGG GAG CT-3'            |
|                                                                | Reverse    | 5'- TGC TCC TCA CAC CAG TTC TTC TC-3'           |
| MAO-B                                                          | Forward    | 5'- ACT CGT GTG CCT TTG GGT TCA G-3'            |
|                                                                | Reverse    | 5'- TGC TCC TCA CAC CAG TTC TTC TC-3'           |
| GAPDH                                                          | Forward    | 5'- CCA TCA CCA TCT TCC AGG AGC GA-3'           |
|                                                                | Reverse    | 5'- GGA TGA CCT TGC CCA CAG CCT TG-3'           |
| primers for preparation of <i>in situ</i> hybridization probes |            |                                                 |
| MAO-A                                                          | Forward    | 5'- TGA CGG ATC TGG AGA AGC CCA GT-3'           |
|                                                                | Reverse    | 5'- AGC CCC CAT TGG AAG ACG CTG AA-3'           |
| MAO-B                                                          | Forward    | 5'- GAC CTG GAA CCT AGC AAG CAG CA-3'           |
|                                                                | Reverse    | 5'- TGA ACC CAA AGG CAC ACG AGA GAT-3'          |
| siRNA constructs for in vitro embryogenesis and gene silencing |            |                                                 |
| MAO-A<br>(exon2/3)                                             | Sense      | 5'- GAG GAA UGA GCA UGU UAA AUG GGU A-3'        |
|                                                                | Anti-sense | 5'-UAC CCA UUU AAC AUG CUC AUU CCU C-3'         |
| MAO-A<br>(exon 8)                                              | Sense      | 5'- ACC AAU UAA UUC AGC GUC UUC CAA U-3'        |
|                                                                | Anti-sense | 5'- AUU GGA AGA CGC UGA AUU AAU UGG U-3'        |
| MAO-B<br>(exon 6)                                              | Sense      | 5'- CAC UAU GGU UCC UGU GGU AUG UGA A-3'        |
|                                                                | Anti-sense | 5'- UUC ACA UAC CAC AGG AAC CAU AGU G-3'        |
| MAO-B<br>(exon 15)                                             | Sense      | 5'- GAC CAC CAU CUU GUC AGC AAC AGC U-3'        |
|                                                                | Anti-sense | 5'- AGC UGU UGC UGA CAA GAU GGU GGU C-3'        |
| Primers for cloning of R1 coding sequence into pcDNA3.1        |            |                                                 |
| R1                                                             | Sense      | 5'-CTC GAG GAT GGA GCT GGC CAC GCG CT-3'        |
|                                                                | Anti-sense | 5'-GCG GCC GCC TAC AGC TGC TTC TGT AAG CTC T-3' |
